# Supplementary material for: Meal-time Smartphone Use in an Obesogenic Environment: Two Longitudinal Observational Studies
Source: PubMed Central journal article supplement (PMC8138713; doi:10.2196/22929), 2021-05-06
Supplement: mhealth_v9i5e22929_app1.pdf [file mhealth_v9i5e22929_app1.pdf]

Appendix A

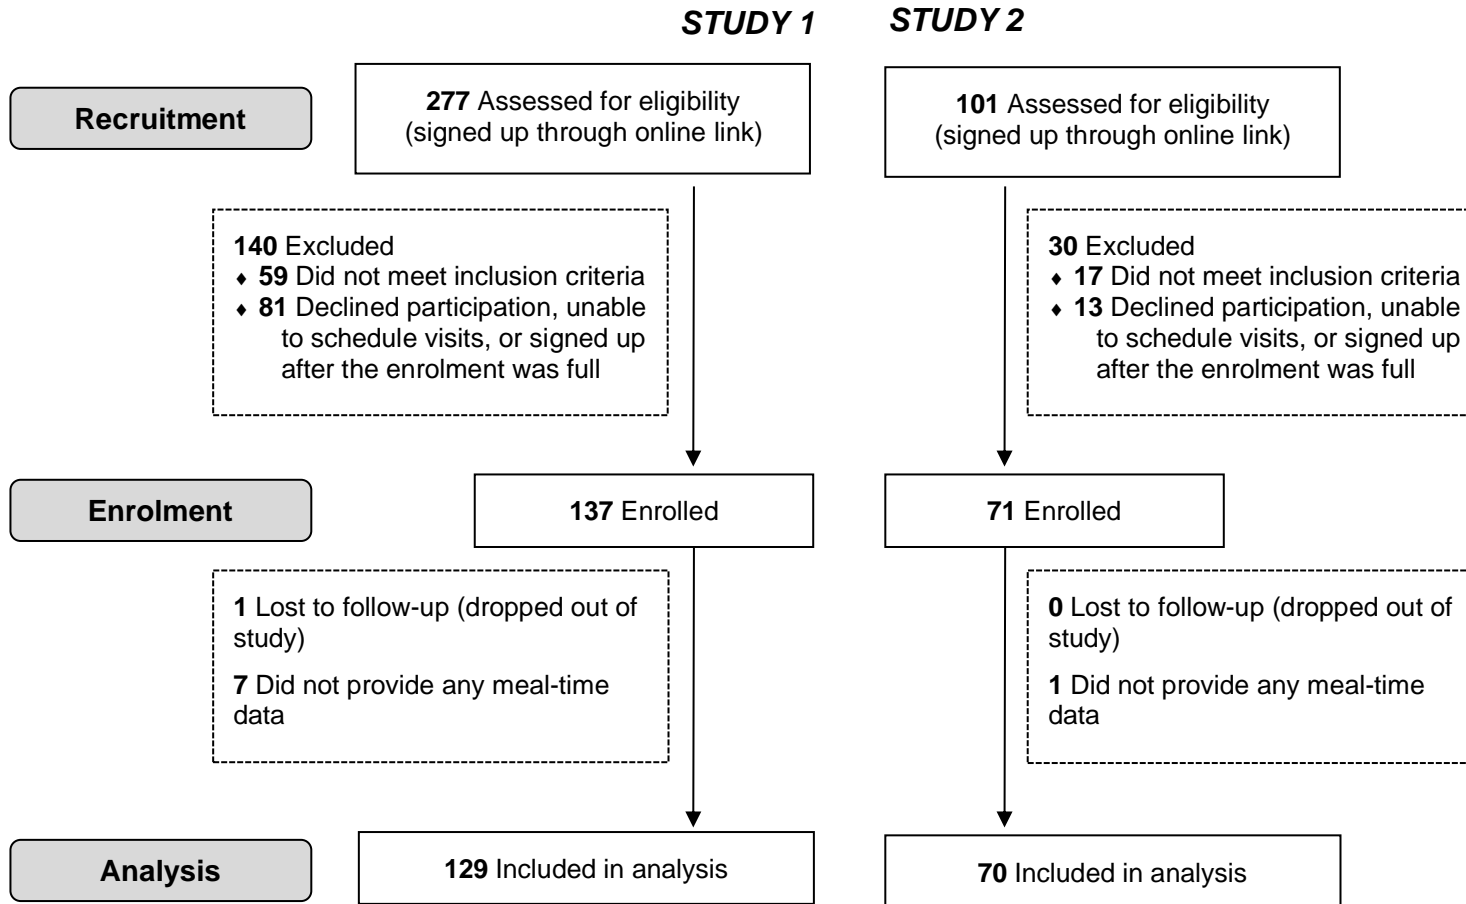

Figure S1. Flow diagram of participant selection and drop-out.
