# Supplementary material for: Meal-time Smartphone Use in an Obesogenic Environment: Two Longitudinal Observational Studies
Source: PubMed Central journal article supplement (PMC8138713; doi:10.2196/22929), 2021-05-06
Supplement: mhealth_v9i5e22929_app4.pdf [file mhealth_v9i5e22929_app4.pdf]

## Appendix D

### Food Photography

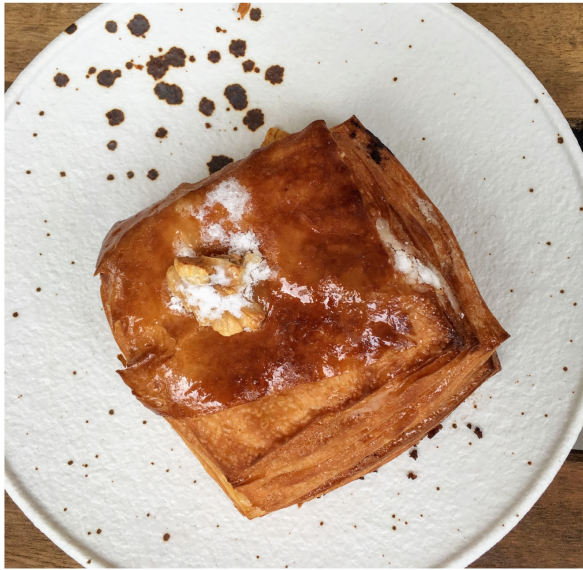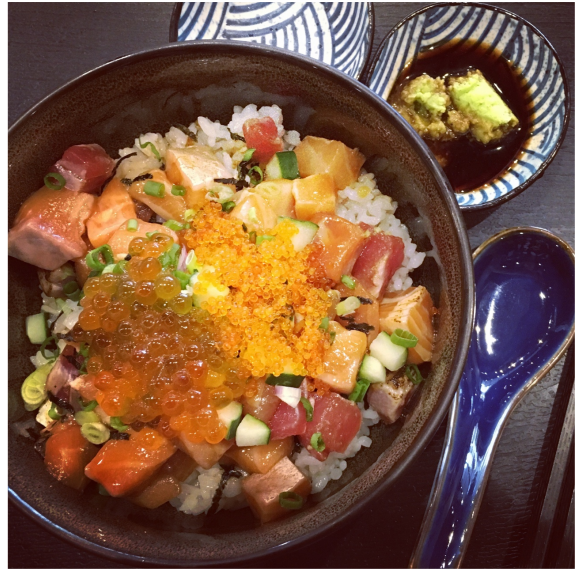

### Non-Food Photography

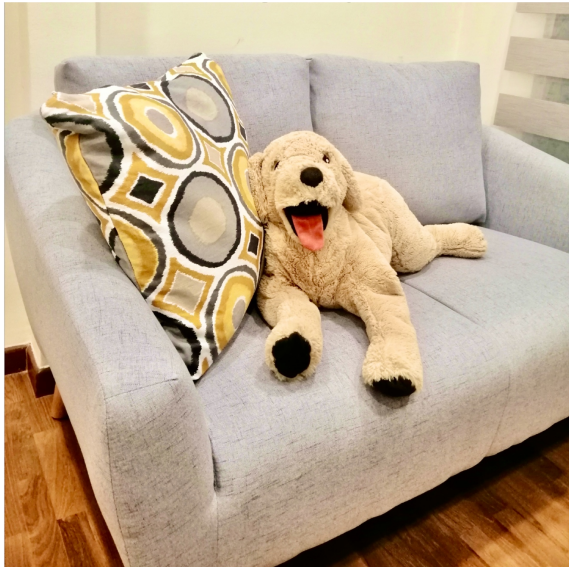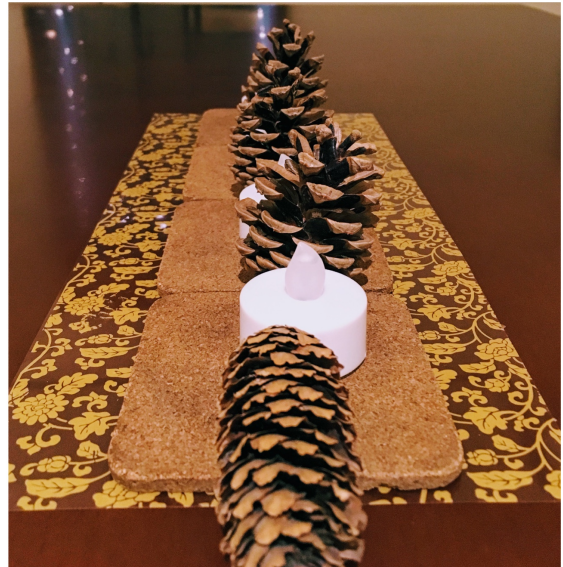

Figure S3. Sample images in the food and non-food photography conditions (Study 2).
