# Supplementary material for: Meal-time Smartphone Use in an Obesogenic Environment: Two Longitudinal Observational Studies
Source: PubMed Central journal article supplement (PMC8138713; doi:10.2196/22929), 2021-05-06
Supplement: mhealth_v9i5e22929_app6.pdf [file mhealth_v9i5e22929_app6.pdf]

## Appendix F

Parameter estimates for the multi-level model of amount of food eaten (Model 1) and enjoyment of food (Model 2) as a function of participants' meal-time phone use condition.

|                                                | Estimate | SE   | <i>t</i> | <i>P</i> | CI <sub>95</sub><br>lower | CI <sub>95</sub><br>upper |
|------------------------------------------------|----------|------|----------|----------|---------------------------|---------------------------|
| <b>(Model 1) Outcome: Amount of food eaten</b> |          |      |          |          |                           |                           |
| <i>Fixed effects</i>                           |          |      |          |          |                           |                           |
| Intercept                                      | 3.85     | 0.18 | 21.18    | <0.001   | 3.49                      | 4.20                      |
| Time (per 3 meals)                             | -0.01    | 0.03 | -0.17    | 0.86     | -0.07                     | 0.06                      |
| Phone use (phone use vs. none)                 | -0.27    | 0.26 | -1.02    | 0.31     | -0.78                     | 0.25                      |
| Photography (food vs. non-food)                | 0.49     | 0.20 | 2.43     | 0.02     | 0.09                      | 0.88                      |
| Meal type                                      | 0.24     | 0.08 | 3.12     | 0.002    | 0.09                      | 0.39                      |
| Phone use x meal type                          | 0.13     | 0.11 | 1.15     | 0.25     | -0.09                     | 0.35                      |
| Photography x meal type                        | -0.23    | 0.09 | -2.61    | 0.009    | -0.40                     | -0.06                     |
| <i>Random effects</i>                          |          |      |          |          |                           |                           |
| Level 2 (between-person)                       |          |      |          |          |                           |                           |
| Intercept                                      | 0.25     | 0.09 | 2.79     | 0.005    | 0.12                      | 0.50                      |
| Level 1 (within-person)                        |          |      |          |          |                           |                           |
| Residual                                       | 1.08     | 0.09 | 11.77    | <0.001   | 0.91                      | 1.28                      |
| Autocorrelation                                | -0.04    | 0.10 | -0.42    | 0.67     | -0.24                     | 0.15                      |
| <b>(Model 2) Outcome: Enjoyment of food</b>    |          |      |          |          |                           |                           |
| <i>Fixed effects</i>                           |          |      |          |          |                           |                           |
| Intercept                                      | 5.00     | 0.18 | 28.21    | <0.001   | 4.65                      | 5.34                      |
| Time (per 3 meals)                             | -0.02    | 0.03 | -0.58    | 0.56     | -0.09                     | 0.05                      |
| Phone use (phone use vs. none)                 | 0.08     | 0.26 | 0.30     | 0.76     | -0.44                     | 0.60                      |
| Phone use (food vs. non-food)                  | -0.02    | 0.20 | -0.11    | 0.91     | -0.42                     | 0.38                      |
| Meal type                                      | 0.17     | 0.08 | 2.20     | 0.03     | 0.02                      | 0.32                      |
| Phone use x meal type                          | 0.08     | 0.11 | 0.71     | 0.48     | -0.14                     | 0.31                      |
| Photography x meal type                        | 0.03     | 0.09 | 0.36     | 0.72     | -0.14                     | 0.21                      |
| <i>Random effects</i>                          |          |      |          |          |                           |                           |
| Level 2 (between-person)                       |          |      |          |          |                           |                           |
| Intercept                                      | 0.09     | 0.06 | 1.37     | 0.17     | 0.02                      | 0.36                      |
| Level 1 (within-person)                        |          |      |          |          |                           |                           |
| Residual                                       | 1.18     | 0.10 | 11.68    | <0.001   | 1.00                      | 1.40                      |
| Autocorrelation                                | 0.03     | 0.08 | 0.42     | 0.68     | -0.13                     | 0.19                      |
